# Supplementary material for: Inducible podocyte-specific deletion of CTCF drives progressive kidney disease and bone abnormalities
Source: JCI journal article supplement (doi:10.1172/jci.insight.95091), 2018-02-21
Supplement: sd1 [file 1]

You are being redirected.
